# Supplementary material for: Fast near infrared sintering of silver nanoparticle ink and applications for flexible hybrid circuits
Source: Royal Society of Chemistry journal article supplement (doi:10.1039/c8ra04468f), 2018-01-01
Supplement: c8ra04468f1.pdf [file c8ra04468f1.pdf]

## Supporting Information

### Fast near infrared sintering of silver nanoparticles ink and application for flexible hybrid circuit

Weibing Gu<sup>a,b</sup>, Wei Yuan<sup>b</sup>, Tao Zhong<sup>c</sup>, Xinzhou Wu<sup>b</sup>, Chunshan Zhou<sup>b</sup>, Jian Lin<sup>b</sup> and Zheng Cui<sup>\*b</sup>

<sup>a</sup>University of Chinese Academy of Sciences

<sup>b</sup>Printable Electronics Research Centre, Suzhou Institute of Nanotech and nano-bionics, Chinese Academy of Sciences(SINANO), Suzhou, China

<sup>c</sup>College of information Engineering, China Jiliang University (CJLU), Hangzhou, 310018, China

\*Corresponding author. Tel : +86-512-6287-2715

\*E-mail : zcui2009@sinano.ac.cn (CUI ZHENG)

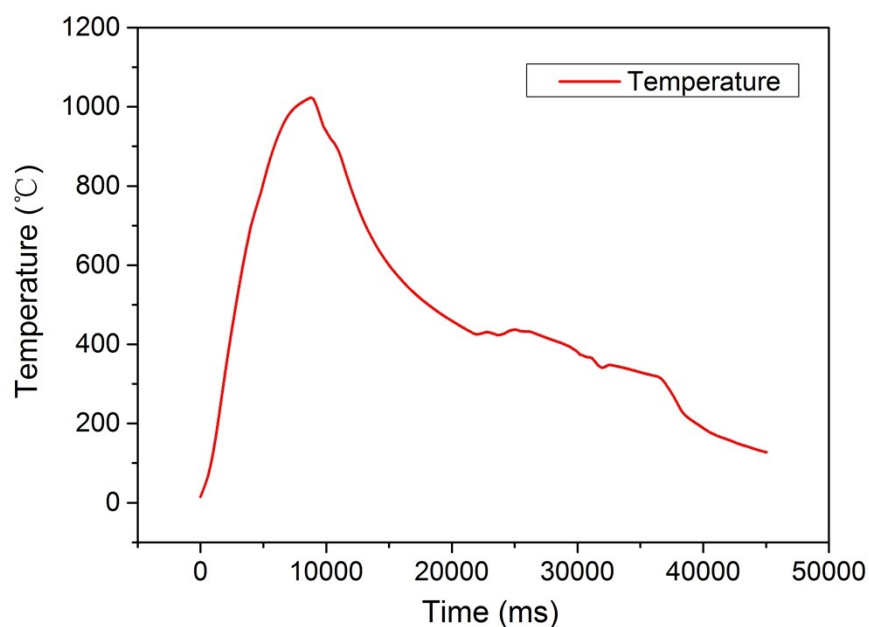

Figure. S1 The temperature profile of AgNP film sintered by NIR with power of 360KW/m<sup>2</sup> in 10 seconds

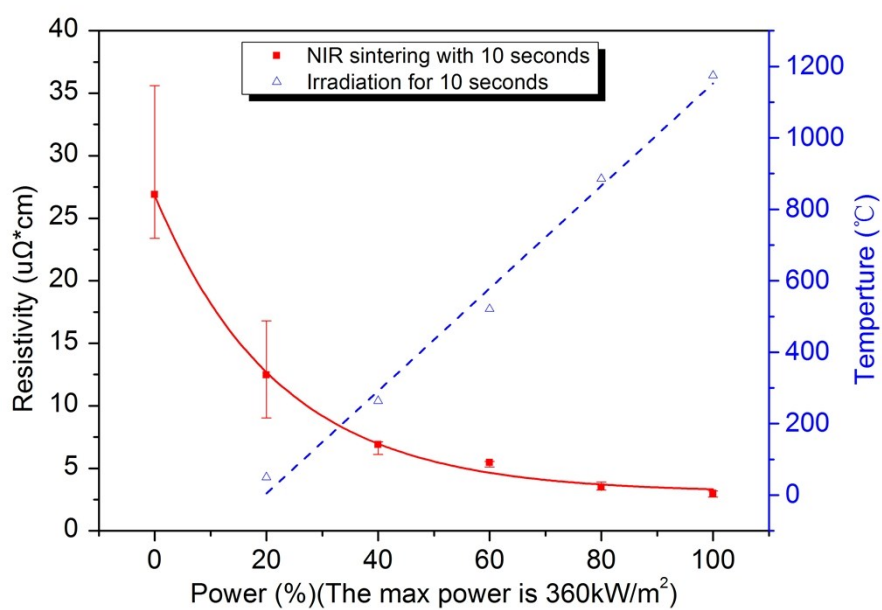

Fig. S2 The resistivity of NIR sintered AgNP film for 10 seconds with changing sintering power and the temperature caused by the corresponding power, the temperature is linear with the NIR output power.

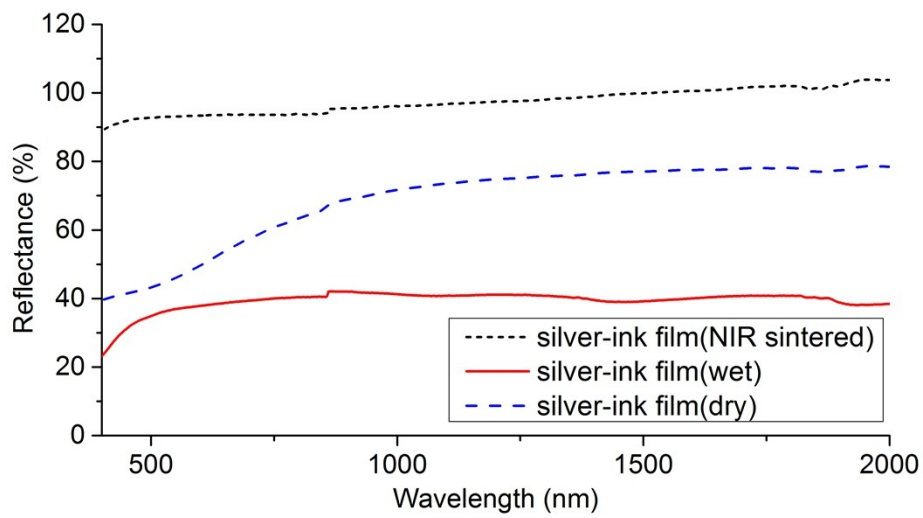

Fig. S3 The reflectance of AgNP film in wet state (red), dry state (blue) and sintered state (black).

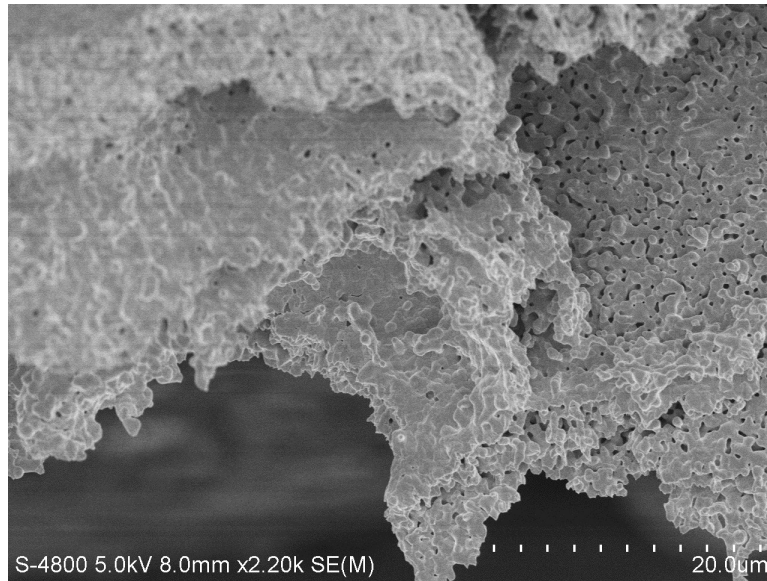

Fig. S4 SEM image of AgNP film sintered by NIR directly without drying processing, peeling appears due to much gas eliminated from the film which caused by solvent and polymer evaporation and decomposition.

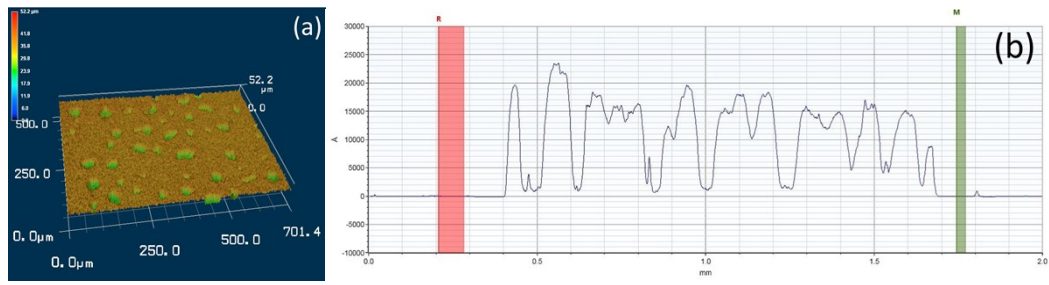

Fig. S5 Height profile of the AgNP film sintered by NIR directly, which measured by (a) optical profilometer and (b) mechanical profilometer.

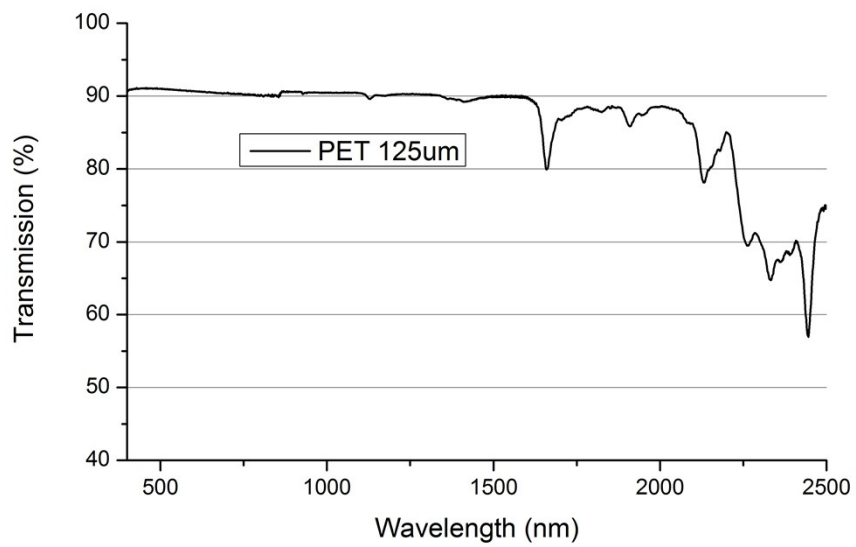

Fig. S6 Transmission spectra of PET polymer substrate

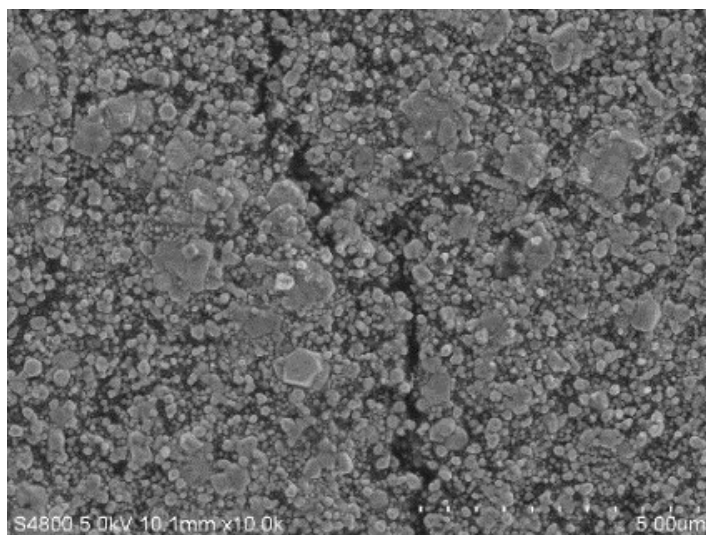

Fig. S7 The SEM image of AgNP pattern sintered by hotplate after rolling test, and some micro cracks appeared in the film which lead to resistance increase.
